1 ***De novo* transcriptome analysis of dermal tissue from the**  
2 **rough-skinned newt, *Taricha granulosa*, enables**  
3 **investigation of tetrodotoxin expression**

4

5 Haley C. Glass\*<sup>1</sup>, Amanda D. Melin<sup>2</sup>, Steven M. Vamosi<sup>1</sup>

6

7 <sup>1</sup>University of Calgary, Department of Biological Sciences, 2500 University Dr. NW

8 Calgary, AB T2N1N4 Canada

9 <sup>2</sup>University of Calgary, Department of Anthropology & Archaeology and Department of

10 Medical Genetics, 2500 University Dr. NW Calgary, AB T2N1N4 Canada

11

12 Contact Information

13 Haley C. Glass\*; haley.glass@ucalgary.ca (\*corresponding author)

14 Amanda D. Melin; amanda.melin@ucalgary.ca

15 Steven M. Vamosi; smvamosi@ucalgary.ca

16

17

18

19

20

21

22

## 23 **Abstract**

## 24 **Background**

25 Tetrodotoxin (TTX) is a potent neurotoxin used in anti-predator defense by several  
26 aquatic species, including the rough-skinned newt, *Taricha granulosa*. While several  
27 possible biological sources of newt TTX have been investigated, mounting evidence  
28 suggests a genetic, endogenous origin. We present here a *de novo* transcriptome  
29 assembly and annotation of dorsal skin samples from the tetrodotoxin-bearing species  
30 *T. granulosa*, to facilitate the study of putative genetic mechanisms of TTX expression.

## 31 **Findings**

32 Approximately 211 million read pairs were assembled into 245,734 transcripts using the  
33 Trinity *de novo* assembly method. Of the assembled transcripts, we were able to  
34 annotate 34% by comparing them to databases of sequences with known functions,  
35 suggesting that many transcripts are unique to the rough-skinned newt. Our assembly  
36 has near-complete sequence information for an estimated 83% of genes based on  
37 Benchmarking Universal Single Copy Orthologs. We also utilized other comparative  
38 methods to assess the quality of our assembly. The *T. granulosa* assembly was  
39 compared with that of the Japanese fire-belly newt, *Cynops pyrrhogaster*, and they were  
40 found to share a total of 30,556 orthologous sequences (12.9% gene set).

## 41 **Conclusions**

42 We provide a reference assembly for *Taricha granulosa* that will enable downstream  
43 differential expression and comparative transcriptomics analyses. This publicly available  
44 transcriptome assembly and annotation dataset will facilitate the investigation of a wide  
45 range of questions concerning amphibian adaptive radiation, and the elucidation of

46 mechanisms of tetrodotoxin defense in *Taricha granulosa* and other TTX-bearing  
47 species.

48

## 49 **Keywords**

50 Rough-skinned newt, *Taricha granulosa*, amphibian, salamander, tetrodotoxin, RNA-  
51 seq, transcriptome, *de novo* assembly

52

## 53 **Data Description**

### 54 **Context**

55 In recent years, there has been rapid progress in massive parallel sequencing  
56 technologies, but there remain many challenges for genomic studies of non-model  
57 organisms [1, 2]. It is especially difficult to study the genomics of species that have  
58 highly repetitive genomes, particularly amphibians, and it can be insurmountable to  
59 produce genome assemblies due to computing resource limitations [3]. To date there  
60 are only seven amphibian genomes published in the NCBI database, compared to e.g.,  
61 654 mammal and 600 insect genomes [4]. A solution to this problem is to utilize a  
62 transcriptomics or RNA-sequencing (RNA-seq) approach from high-throughput  
63 sequencing data build from high-quality RNA. One goal of RNA-seq is to interpret the  
64 functional elements of the genome, which makes this a feasible solution for studying  
65 genes from species with highly repetitive genomes [5]. Moreover, this approach allows  
66 the *de novo* assembly and analysis of the transcriptome without mapping to a reference  
67 genome [6]. *De novo* transcriptome assembly methods can outperform genome-guided

68 assemblies in non-model organisms and are especially useful for diverged species or  
69 those with complex genomes [7].

70         Researchers would benefit from having improved genetic and genomic resources  
71 for one amphibian species that has been the subject of much historical and  
72 contemporary work and is now a textbook story of predator-prey interaction: the rough-  
73 skinned newt, *Taricha granulosa*. This urodelian amphibian, endemic to the west coast  
74 of North America, possesses a potent neurotoxin known as tetrodotoxin (TTX) that is  
75 primarily excreted through their dorsal skin as a predator deterrent [8]. There is  
76 significant variation in TTX concentration among populations of newts, and researchers  
77 had previously suggested this is attributed to predation pressure from garter snakes,  
78 *Thamnophis sirtalis* [i.e., 9, 10, 11]. However, new work has suggested that TTX  
79 variation in rough-skinned newts may instead be due to neutral population divergence,  
80 whereas snake resistance is an evolutionary response to prey toxicity [12]. This  
81 defense mechanism has also convergently evolved in several other diverse species  
82 including puffer fish, blue ringed octopus, and moon snails [13].

83         Although the toxicity of rough-skinned newts has been well studied over the past  
84 few decades, the source of toxin production has been widely debated. First, it was  
85 suggested that TTX is bio-accumulated as a result of diet, but this was rejected when  
86 newts that were kept in captivity and fed a TTX-free diet retained their toxin  
87 concentrations over time [14]. Next, Lehman et al. [15] rejected the hypothesis that  
88 bacterial endosymbionts are responsible for the observed toxicity after discovering that  
89 none of the bacteria present on newt skin were capable of producing TTX. These  
90 findings led to the hypothesis that tetrodotoxin biosynthesis is under genetic control and

91 toxins are synthesized within the individual. However, a satisfactory determination of the  
92 genetic mechanisms responsible for TTX expression remains lacking, despite the fact  
93 that previous studies suggest an endogenous origin [16].

94 In addition to the lack of information regarding the origin of tetrodotoxin in rough-  
95 skinned newts, they also have very limited genetic data published in general. We are  
96 not aware of any work published on high-throughput sequencing data from this species,  
97 and previous studies have focused only on mitochondrial markers, allozymes, and  
98 microsatellites [i.e., 17, 18, 19, 20]. While rough-skinned newts are presently listed as a  
99 species of Least Concern, a subspecies known as the Mazama newt (*Taricha granulosa*  
100 *mazamae*) is currently threatened by invasive crayfish in Crater Lake National Park in  
101 Oregon, USA [21]. Due to the sensitivity of amphibians to invasive species such as  
102 crayfish, as well as other anthropogenic disturbances, it will be crucial to have more  
103 robust genetic resources of rough-skinned newts available.

104 Our goal is to provide a high-quality transcriptome from the dorsal tissue of a  
105 newt species known to produce high quantities of tetrodotoxin, in order to make a  
106 crucial step towards elucidating the genetic mechanisms of TTX expression. Here, we  
107 present the transcriptome assembly and annotation of *Taricha granulosa* using Illumina  
108 RNA-sequencing technology and bioinformatics tools. Genetic and genomic references  
109 for rough-skinned newts are sparse and, to our knowledge, this is the first report on  
110 transcriptome analyses for the species. This work provides a valuable resource for  
111 studying the chemical ecology of tetrodotoxin in *T. granulosa* as well as for other TTX-  
112 bearing species. In addition, this will expand our understanding of salamander genes in  
113 general.

114

## 115 **Sample Collection and Preparation**

116 Four male rough-skinned newts were collected from different lakes in British  
117 Columbia, Canada either by net or in a minnow trap. Following a non-lethal sampling  
118 method [22], a 2mm skin biopsy tool (Robbins Instruments, USA) was used to remove a  
119 skin sample from the posterior dorsolateral area of each individual, and the newts were  
120 returned to their original habitat. The skin sample was immediately placed in a tube of  
121 RNAlater solution (Thermo Fisher Scientific, USA), which was kept at room temperature  
122 for approximately 24 hours. The tubes were then placed in a liquid nitrogen dewar at  
123 approximately -190C before transportation back to the University of Calgary for storage  
124 at -80C.

125 Total RNA was isolated and purified with the RNeasy micro extraction kit (Qiagen,  
126 USA) using a modified protocol in which the tissue samples were macerated with a glass  
127 tissue grinder without freezing in liquid nitrogen. Individual libraries were constructed  
128 using the TruSeq Stranded mRNA Library Prep kit (Illumina, USA). The libraries were  
129 sequenced (100-bp paired-end) on an Illumina HiSeq 4000 at a sequencing depth of  
130 approximately 51-62M reads per library. Library preparation and sequencing was  
131 performed at the Genome Quebec Innovation Centre. Raw sequencing reads can be  
132 found at the National Center for Biotechnology Information (NCBI) Short Read Archive  
133 (SRA) under BioProject Accession PRJNA505885.

134

## 135 ***De Novo* Transcriptome Assembly**

136 Raw reads from the four individuals were first pooled into a single fasta file,  
137 representing a combined total of 230,544,185 reads. To remove low quality reads, quality  
138 control was performed with Trimmomatic v0.36 [23] using the following parameters: (i)  
139 Trimming of bases at the leading and trailing ends of sequences with a phred+33 quality  
140 score below 20, (ii) a 4-base sliding window scan to remove read fragments with an  
141 average quality per base below 20, and (iii) removal of reads below 36 base pairs long.  
142 After trimming, 91.47% of read pairs (N=210,868,103) remained, and only reads with both  
143 pairs remaining were used for the assembly. The quality-filtered reads were then used to  
144 perform a *de novo* transcriptome assembly with Trinity v2.6.5 [6, 24] using the default  
145 parameters. The reads were assembled into 245,734 transcripts and represent an  
146 average length of 837.57 bp, median length of 339, N50 length of 2093, and GC content  
147 of 44.96% (Table 1, Fig. S1: Additional File 1).

148

149 **Table 1.** Assembly statistics for the *de novo* assembled transcriptome of the rough-skinned newt.

| <b>Assembly Statistics</b>    |             |
|-------------------------------|-------------|
| Number of Filtered Read Pairs | 210,868,103 |
| Assembly Size, bp             | 205,818,378 |
| Number of Trinity Transcripts | 245,734     |
| Number of Trinity Genes       | 167,028     |
| GC (%)                        | 44.96       |
| Contig N10                    | 6,738       |
| Contig N20                    | 4,914       |
| Contig N30                    | 3,799       |
| Contig N40                    | 2,887       |
| Contig N50                    | 2,093       |
| Median Contig Length, bp      | 338         |
| Average Contig Length, bp     | 837.57      |

150

## 151 **Assembly Assessment**

152 We utilized several methods to assess the quality of the *de novo* assembly we  
153 generated. The quality filtered reads were aligned to our assembly with Bowtie2 [25],  
154 revealing that approximately 98% of paired reads were properly mapped. Next, we  
155 estimated the assembly completeness using BUSCO v3.2.0 [26] by determining the  
156 conserved ortholog content with the Tetrapod OrthoDB database [27]. Benchmarking  
157 Universal Single-Copy Orthologs (BUSCOs) were identified which revealed that our  
158 transcriptome has near-complete genes for 82.5% of the *T. granulosa* genome [46.3%  
159 complete and single-copy (N=1830), 36.2% complete and duplicated (N=1428)], with  
160 5.7% fragmented (N=225) and 11.8% missing (N=467) (Fig. S2: Additional File 1). The  
161 duplication seen in our BUSCO results is also similar to that of *Cynops pyrrhogaster* [28]  
162 and *Ambystoma mexicanum* [29], and could be due to several reasons. First, amphibians  
163 are known to have complex, highly duplicated genomes [30]. The Trinity assembly may  
164 also include isoforms of the same gene or allelic heterozygote transcripts from different  
165 individuals.

166 We also measured the similarity between our assembly and that of retinal tissue  
167 from the Japanese fire belly newt, *C. pyrrhogaster* [28], since these species are both from  
168 the Salamandridae family and had comparable assembly statistics. Orthologs between  
169 the rough-skinned newt and eastern newt transcriptome assemblies were identified using  
170 a reciprocal best-hit BLAST approach. A total of 30,556 orthologous sequences between  
171 the two transcriptomes were detected with a query coverage above 70%, which  
172 represented approximately 12.9% of *C. pyrrhogaster* transcripts. The number of  
173 orthologous sequences is higher than in other salamander species reciprocal best-hit



174 blast comparisons [31] and could be because they both belong to the Salamandridae  
 175 family and share a more recent common ancestor than some of the other cross-family  
 176 orthology comparisons.

177 Additionally, we compared the assembly statistics from our transcriptome to those  
 178 of six other species to benchmark our assembly completeness (Table 2). These studies  
 179 were selected for comparison in order to represent a variety of urodelian amphibian  
 180 species with completed transcriptome assemblies. The *de novo* transcriptome assembly  
 181 of *T. granulosa* yielded comparable assembly and annotation statistics to other  
 182 salamander assemblies. Specifically, it had similar BUSCO results to *C. phyrrogaster* and  
 183 *A. mexicanum*.

184

185 **Table 2.** Assembly information and BUSCOs of this study and other studies of closely related  
 186 species.

| Species                                                               | Assembled Bases, bp | Number of Transcripts | Number of Genes | BUSCOs                                 |
|-----------------------------------------------------------------------|---------------------|-----------------------|-----------------|----------------------------------------|
| <i>Taricha granulosa</i> ,<br>Rough-skinned newt                      | 205,818,378         | 245,734               | 167,028         | C: 82.5% [D: 36.2%], F: 5.7%, M: 11.8% |
| <i>Cynops pyrrhogaster</i> ,<br>Japanese fire belly newt <sup>a</sup> | Not reported        | 237,120               | Not reported    | C: 82% [D: 34%], F: 4.6%, M: 13%       |
| <i>Nopthothalamus viridescens</i> ,<br>Eastern newt <sup>b</sup>      | Not reported        | 120,922               | Not reported    | C: 30% [D: 7.0%], F: 10%, M: 58%       |
| <i>Lissotriton boscai</i> ,<br>Bosca's newt <sup>c</sup>              | 173,736,688         | 153,270               | Not reported    | Not Reported                           |

|                                                                                  |              |           |           |                                             |
|----------------------------------------------------------------------------------|--------------|-----------|-----------|---------------------------------------------|
| <i>Ambystoma mexicanum</i> ,<br>Mexican axolotl <sup>d</sup>                     | Not reported | 1,554,055 | 1,388,798 | C: 88% [D: 53%],<br>F: 4.5%, M: 7.3%        |
| <i>Andrias davidianus</i> ,<br>Chinese giant<br>salamander <sup>e</sup>          | 128,175,999  | 158,103   | 132,912   | Not Reported                                |
| <i>Bolitoglossa ramosi</i> ,<br>Ramos' mushroomtongue<br>salamander <sup>f</sup> | 654,673,506  | 577,037   | 433,809   | C: 78.2% [D:<br>2.4%], F: 9.9%,<br>M: 11.9% |

187 <sup>a</sup>[28];<sup>b</sup>[37];<sup>c</sup>[38];<sup>d</sup>[29];<sup>e</sup>[39];<sup>f</sup>[31]. Statistics from the de novo assembly and BUSCOs (C: Complete,  
188 D: Duplicated, F: Fragmented, M: Missing) of our *T. granulosa* transcriptome together with  
189 transcriptome assemblies of related species. Complete BUSCOs include both complete & single-  
190 copy and complete & duplicate sequences.

191

## 192 **Functional Annotation and Gene Ontology**

193 To better understand putative functions of assembled transcripts, we conducted  
194 functional annotation and assigned Gene Ontology (GO) terms with the Trinotate v3.1.1  
195 pipeline [29]. TransDecoder v5.5.0 was first used to locate candidate coding regions  
196 and identify those with the longest open reading frame [32]. Contigs were characterized  
197 via BLASTx and BLASTp sequence homology searches against UniProt/SwissProt  
198 NCBI NR protein database, using BLAST+ v2.4.0 with an e-value cutoff of  $e^{-5}$  [33]. We  
199 based our choice of e-value following methods for the annotation of the axolotl  
200 transcriptome by the authors of the Trinotate pipeline [29]. Additionally, PFAM functional  
201 domains were identified with HMMER v3.0 [34], transmembrane domains with TMHMM  
202 v2.0 [35], and signal peptides with SignalP v4.1 [36]. Gene Ontology terms were also  
203 assigned via Trinotate v3.1.1 and were based on best matches in the UniProt/SwissProt

204 database. The results from these analyses were loaded into an Sqlite database to  
205 generate a Trinotate functional annotation report.

206 There were a total of 82,960 annotated transcripts for *T. granulosa*, representing  
207 about 33.8% of the 245,734 *de novo* assembled transcripts. This annotation rate is  
208 similar to the 36.7% of 237,120 transcripts annotated for *C. phyroghaster* [28].

209 Unannotated transcripts could indicate artifacts of misassemblies or non-coding RNAs,  
210 but many may also be novel genes with unknown function due to the general lack of  
211 knowledge about newt proteins. A total of 48,309 transcripts were assigned at least one  
212 GO term, which covered various functional pathways (Table 3). Of those, approximately  
213 48.6% were classified as biological processes, 23.0% as molecular functions, and  
214 28.4% as cellular components. Many GO terms could be assigned to one transcript, so  
215 there was significant overlap between the three categories (Fig. S3: Additional File 1).

216

217 **Table 3.** Top gene ontology categories.

|                           | <b>Category</b>                                      | <b>Count</b> |
|---------------------------|------------------------------------------------------|--------------|
| <b>Cellular Component</b> | Nucleus                                              | 14,903       |
|                           | Cytoplasm                                            | 13,171       |
|                           | Integral Component of Membrane                       | 7,931        |
|                           | Plasma Membrane                                      | 7,005        |
|                           | Cytosol                                              | 5,803        |
|                           | Nucleoplasm                                          | 5,318        |
|                           | Extracellular Exosome                                | 4,852        |
|                           | Membrane                                             | 4,490        |
|                           | Mitochondrion                                        | 2,863        |
|                           | Nucleolus                                            | 2,125        |
| <b>Molecular Function</b> | Metal Ion Binding                                    | 8,584        |
|                           | DNA Binding                                          | 5,742        |
|                           | ATP Binding                                          | 5,022        |
|                           | Zinc Ion Binding                                     | 4,428        |
|                           | RNA-directed DNA polymerase activity                 | 3,406        |
|                           | Transcription factor activity, sequence-specific DNA | 2,893        |

|                           |                                                                      |       |
|---------------------------|----------------------------------------------------------------------|-------|
|                           | binding                                                              |       |
|                           | Poly(A) RNA Binding                                                  | 2,646 |
|                           | RNA Binding                                                          | 2,090 |
|                           | Calcium Ion Binding                                                  | 1,637 |
|                           | Nucleic Acid Binding                                                 | 1,614 |
| <b>Biological Process</b> | Transcription, DNA-templated                                         | 6,880 |
|                           | Regulation of transcription, DNA-templated                           | 4,652 |
|                           | DNA recombination                                                    | 2,022 |
|                           | DNA Integration                                                      | 1,902 |
|                           | Positive regulation of transcription from RNA polymerase II promoter | 1,846 |
|                           | Negative regulation of transcription from RNA polymerase II promoter | 1,580 |
|                           | Small molecule metabolic process                                     | 1,525 |
|                           | Innate immune response                                               | 1,344 |
|                           | Signal transduction                                                  | 1,340 |
|                           | Apoptotic process                                                    | 1,287 |

218

219 Top ten GO categories for each of cellular component, molecular function, and biological  
220 process, as identified by best matches in the UniProt/SwissProt database with Trinotate v3.1.1  
221 [29].

222

## 223 **Conclusions**

224 To our knowledge, we present the first report of a transcriptome assembly and  
225 annotation of dorsal skin from the tetrodotoxin-bearing rough-skinned newt, *Taricha*  
226 *granulosa*. Rough-skinned newts are known to excrete high concentrations of a potent  
227 neurotoxin called tetrodotoxin, but previous studies have been unable to identify an  
228 endogenous origin in this species. The transcriptome data provided here will be a  
229 valuable resource in elucidating potential genetic mechanisms of tetrodotoxin  
230 expression in *T. granulosa* and other TTX-bearing species. Additionally, our work may  
231 be useful to other researchers studying this species for other purposes such as  
232 population genetics analyses or comparative transcriptomics. This data will also

233 advance the availability of amphibian genomic resources, and enable researchers to  
234 continue expanding our knowledge of amphibian genes.

235

## 236 **Availability of Supporting Data**

237 The raw sequencing reads are available in the NCBI Short Read Archive (SRA) under  
238 BioProject Accession PRJNA505885. This Transcriptome Shotgun Assembly project  
239 has been deposited at DDBJ/EMBL/GenBank under the accession GHKF00000000.  
240 The version described in this paper is the first version, GHKF01000000.

241

## 242 **Additional Files**

243 Additional File 1: Figure S1: Histogram showing the distribution of transcripts assembled  
244 by Trinity v2.6.5, binned by length.

245 Additional File 1: Figure S2: Benchmarking Universal Single-Copy Orthologs (BUSCOs)  
246 identified by comparing the assembly to the Tetrapod OrthoDB database. The BUSCOs  
247 were 46.4% complete and single-copy (N=1834), 36.6% complete and duplicated  
248 (N=1445), 5.5% fragmented (N=218), and 11.5% missing (N=453).

249 Additional File 1: Figure S3: Venn diagram of Gene Ontology (GO) categories of the  
250 annotated transcripts, assigned using the Trinotate pipeline. The values represent the  
251 number of transcripts with a GO assignment from each of 3 categories: Biological  
252 Process, Molecular Function, and Cellular Component.

253

254

255

256 **Declarations**

257 **Abbreviations**

258 TTX = Tetrodotoxin, RNA-seq = RNA sequencing, bp = base pairs, BUSCO =  
259 Benchmarking Universal Single Copy Orthologs, GO = Gene Ontology, NCBI = National  
260 Center for Biotechnology Information, SRA = Short Read Archive, TSA = Transcriptome  
261 Shotgun Assembly

262

263 **Ethics Statement**

264 Ethics approval was provided by the University of Calgary under Animal Use Protocol  
265 AC15-0033 and sample collection was performed in accordance with BC Wildlife Act  
266 Permit NA17-263401.

267

268 **Competing Interests**

269 We declare no competing interests.

270

271 **Author Contributions**

272 HG completed field work and collected samples, isolated RNA and prepared samples  
273 for sequencing, performed transcriptome assembly and analysis. HG, AM, and SMV  
274 participated in study design, manuscript draft preparation, and review and approval of  
275 the manuscript for final submission.

276

277 **Acknowledgments**

278 This work was funded by a Natural Sciences and Engineering Research Council of  
279 Canada grant (03915-2018) to AM, infrastructure provided by the Canada Research  
280 Chairs program (231257) and Canadian Foundation for Innovation (35776) to AM, and  
281 internal research funds provided by the University of Calgary to SMV. This research  
282 was also enabled in part by access to computing resources provided by WestGrid [40]  
283 and Compute Canada [41], along with the Helix cluster from the University of Calgary's  
284 Cumming School of Medicine. We would also like to thank Jade Spruyt for her  
285 assistance in the field and the lab and Gwen Duytschaever for her ongoing support in  
286 the lab.

287

## 288 **References**

- 289 1. Gayral P, Melo-Ferreira J, Glémin S, Bierne N, Carneiro M, Nabholz B, Lourenco JM,  
290 Alves PC, Ballenghien M, Faivre N, Belkhir K, Cahais V, Loire E, Bernard A, Galtier N.  
291 Reference-Free Population Genomics from Next-Generation Transcriptome Data and  
292 the Vertebrate–Invertebrate Gap. *PLOS Genet.* 2013;9(4):e1003457.
- 293 2. da Fonseca RR, Albrechtsen A, Themudo GE, Ramos-Madriral J, Sibbesen JA,  
294 Maretty L, Zepeda-Mendoza ML, Campos PF, Heller R, Pereira RJ. Next-generation  
295 biology: Sequencing and data analysis approaches for non-model organisms. *Mar*  
296 *Genomics.* 2016;30:3-13.
- 297 3. Funk WC, Zamudio KR, Crawford AJ. Advancing Understanding of Amphibian  
298 Evolution, Ecology, Behavior, and Conservation with Massively Parallel Sequencing.  
299 Population Genomics. In: Hohenlohe P, Rajora OP, editors. *Population Genomics:*  
300 *Wildlife.* Springer Nature; 2018. p. 1-44.

- 301 4. National Center for Biotechnology Information, Genome.  
302 <https://www.ncbi.nlm.nih.gov/genome/>. Accessed 12 April 2019.
- 303 5. Wang Z, Gerstein M, Snyder M. RNA-Seq: a revolutionary tool for transcriptomics.  
304 Nat Rev Genet. 2009;10(1):57-63.
- 305 6. Grabherr MG, Haas, BJ, Yassour M, Levin JZ, Thompson DA, Amit, I, Adiconis X,  
306 Fan L, Raychowdhury R, Zeng Q, Chen Z, Mauceli E, Hecohen N, Gnirke A, Rhind N, di  
307 Palma F, Birren BW, Nusbaum C, Lindblad-Toh K, Friedman N, Regev A. Full-length  
308 transcriptome assembly from RNA-Seq data without a reference genome. Nat  
309 Biotechnol. 2011;29(7):644-652.
- 310 7. Huang X, Chen XG, Armbruster PA. Comparative performance of transcriptome  
311 assembly methods for non-model organisms. BMC Genom. 2016;17: 523.
- 312 8. Brodie ED Jr. 1968. Investigations on the skin toxin of the adult rough-skinned Newt,  
313 *Taricha granulosa*. Copeia. 1968;2:307-313.
- 314 9. Brodie ED III, Brodie ED Jr. Tetrodotoxin resistance in garter snakes: An evolutionary  
315 response of predators to dangerous prey. Evolution. 1990;44(3):651-659.
- 316 10. Brodie ED III, Ridenhour BJ, Brodie ED Jr. The evolutionary response of predators  
317 to dangerous prey: Hotspots and coldspots in the geographic mosaic of coevolution  
318 between garter snakes and newts. Evolution. 2002;56(10):2067-2082.
- 319 11. Brodie ED III, Feldman CR, Hanifin CT, Motychak JE, Mulcahy DG, Williams BL,  
320 Brodie ED Jr. Parallel arms races between garter snakes and newts involving  
321 tetrodotoxin as the phenotypic interface of coevolution. Journal of Chemical Ecology.  
322 2005;31(2):343-356.



- 323 12. Hague MTJ, Stokes AN, Feldman CR, Brodie ED Jr., Brodie ED III. Genetic  
324 structure of prey populations underlies the geographic mosaic of arms race coevolution.  
325 bioRxiv. 2015; doi:10.1101/585851.
- 326 13. Moczydlowski EG. The molecular mystique of tetrodotoxin. *Toxicon*. 2013;63:165-  
327 183.
- 328 14. Hanifin CT, Brodie ED III, Brodie ED Jr. Tetrodotoxin levels of the rough-skin newt,  
329 *Taricha granulosa*, increase in long-term captivity. *Toxicon*. 2002;40(8): 1149-1153.
- 330 15. Lehman EM, Brodie ED Jr., Brodie ED III. No evidence for an endosymbiotic  
331 bacterial origin of tetrodotoxin in the newt *Taricha granulosa*. *Toxicon*. 2004;44:243-249.
- 332 16. Chau R, Kalaitzis JA, Neilan BA. On the origins and biosynthesis of tetrodotoxin.  
333 *Aquat Toxicol*. 2011;104:61-72.
- 334 17. Jones AG, Blouin MS, Arnold SJ. Genetic variation in two populations of the rough-  
335 skinned newt (*Taricha granulosa*) assessed using novel tetranucleotide microsatellite  
336 loci. *Mol Ecol Notes*. 2001;1(4):293-296.
- 337 18. Kuchta SR, Tan A. Isolation by distance and post-glacial range expansion in the  
338 rough-skinned newt, *Taricha granulosa*. *Mol Ecol*. 2004;14(1):225-244.
- 339 19. Ridenhour BJ, Brodie ED Jr., Brodie ED III. Patterns of genetic differentiation in  
340 *Thamnophis* and *Taricha* from the Pacific Northwest. *J. Biogeogr*. 2004;34(4): 724-735.
- 341 20. Hague MT, Avila LA, Hanifin CT, Snedden WA, Stokes AN, Brodie ED III, Brodie ED  
342 Jr. Toxicity and population structure of the rough-skinned newt (*Taricha granulosa*)  
343 outside the range of an arms race with resistant predators. *Ecol Evol*. 2016;6(9):2714-  
344 2724.

- 345 21. Buktenica MW, Girdner SF, Ray AM, Hering DK, Umek J. The impact of introduced  
346 crayfish on a unique population of salamander in Crater Lake, Oregon. *Park Science*.  
347 2015;32(1):5-12.
- 348 22. Bucciarelli GM, Li A, Kats LB, Green DB. Quantifying tetrodotoxin levels in the  
349 California newt using a non-destructive sampling method. *Toxicon*. 2014;80: 87-93.
- 350 23. Bolger AM, Lohse M, Usadel B. Trimmomatic: a flexible trimmer for Illumina  
351 sequence data. *Bioinformatics*. 2014;30(15):2114-2120.
- 352 24. Haas BJ, Papanicolaou A, Yassour M, Grabherr M, Blood PD, Bowden J, Couger  
353 MB, Eccles D, Li B, Lieber M, MacManes MD, Ott M, Orvis J, Pochet N, Strozzi F,  
354 Weeks N, Westerman R, William T, Dewey CN, Henschel R, LeDuc RD, Friedman N,  
355 Regev A. De novo transcript sequence reconstruction from RNA-seq using the Trinity  
356 platform for reference generation and analysis. *Nat Protoc*. 2013;8(8):1494-1512.
- 357 25. Langmead B, Salzberg SL. Fast gapped-read alignment with Bowtie 2. *Nat*  
358 *Methods*. 2012;9(4):357-359.
- 359 26. Waterhouse, RM, Seppey M, Simão FA, Manni M, Ioannidis P, Klioutchnikov G,  
360 Kriventseva EV, Zdobnov EM. BUSCO applications from quality assessments to gene  
361 prediction and phylogenomics. *Mol. Biol. Evol*. 2017;35(3):543-548.
- 362 27. Zdobnov, EM, Tegenfeldt F, Kuznetsov D, Waterhouse RM, Simão FA., Ioannidis P,  
363 Seppey M, Loetscher A, Kriventseva EV. OrthoDB v9.1: cataloging evolutionary and  
364 functional annotations for animal, fungal, plant, archaeal, bacterial and viral orthologs.  
365 *Nucleic Acids Res*. 2016;45(D1):D744-D749.
- 366 28. Nakamura K, Islam MR, Takayanagi M, Yasumuro H, Inami W, Kunahong A, Casco-  
367 Robles RM, Toyoma F, Chiba C. A Transcriptome for the Study of Early Processes of

- 368 Retinal Regeneration in the Adult Newt, *Cynops pyrrhogaster*. PLoS One.  
369 2014;9(10):e109831.
- 370 29. Bryant DM, Johnson K, DiTommaso T, Tickle T, Couger MB, Payzin-Dogru D, Lee  
371 TJ, Leigh ND, Kuo TH, Davis FG, Bateman J, Bryant S, Guzikowski AR, Tsai SL, Coyne  
372 S, Ye WW, Freeman RM Jr, Peshkin L, Tabin CJ, Regev A, Haas BJ, Whited JL. A  
373 Tissue-Mapped Axolotl De Novo Transcriptome Enables Identification of Limb  
374 Regeneration Factors. Cell Rep. 2017;18(3):762-776.
- 375 30. Mable BK, Alexandrou MA, Taylor MI. Genome duplication in amphibians and fish:  
376 an extended synthesis. J Zool. 2011;284:151-182.
- 377 31. Gomez CMA, Woodcock RM, Smith JJ, Voss RS, Delgado JP. Using  
378 transcriptomics to enable a plethodontid salamander (*Bolitoglossa ramosi*) for limb  
379 regeneration research. BMC Genom. 2018;19:704.
- 380 32. TransDecoder (Find Coding Regions Within Transcripts).  
381 <http://transdecoder.github.io/>. Accessed 21 Nov 2018.
- 382 33. Camacho C, Coulouris G, Avagyan V, Ma N, Papadopoulos J, Bealer K, Madden  
383 TL. BLAST+: architecture and applications. BMC Bioinform. 2009;10:421.
- 384 34. HMMER: biosequence analysis using profile hidden Markov models.  
385 <http://hmmer.org/>. Accessed 20 Nov 2018.
- 386 35. Sonnhammer ELL, von Heijne G, Krogh A. A hidden Markov model for predicting  
387 transmembrane helices in protein sequences. In: Glasgow J, Littlejohn T, Major F,  
388 Lathrop R, Sankoff D, Sensen C, editors. Proceedings of the Sixth International  
389 Conference on Intelligent Systems for Molecular Biology. Menlo Park: AAAI Press;  
390 1998. p. 175-182.

- 391 36. Petersen TN, Brunak S, von Heijne G, Nielsen H. SignalP 4.0: discriminating signal  
392 peptides from transmembrane regions. *Nat. Methods*. 2011;8:785-786.
- 393 Lagesen K, Hallin PF, Rødland E, Stærfeldt HH, Rognes T, Ussery DW. RNAMmer:  
394 consistent annotation of rRNA genes in genomic sequences. *Nucleic Acids Res*.  
395 2007;35(9):3100-3108.
- 396 37. Looso M, Preussner J, Sousounis K, Bruckskotten M, Michel CS, Lignelli E,  
397 Reinhardt R, Höffner S, Krüger M, Tsonis PA, Borchardt T, Braun T. A de novo  
398 assembly of the newt transcriptome combined with proteomic validation identifies new  
399 protein families expressed during tissue regeneration. *Genome Biol*. 2013;14:R16.
- 400 38. Nourisson C, Muñoz-Merida A, Carneiro M, Sequeira F. De novo transcriptome  
401 assembly and polymorphism detection in two highly divergent evolutionary units of  
402 Bosca's newt (*Lissotriton boscai*) endemic to the Iberian Peninsula. *Mol Ecol Resour*.  
403 2017;17(3):546-549.
- 404 39. Huang Y, Xiong JL, Gao XC, Sun XH. Transcriptome analysis of the Chinese giant  
405 salamander (*Andrias davidianus*) using RNA-sequencing. *Genom Data*. 2017;14:126-  
406 131.
- 407 40. Westgrid, Compute Canada Regional Partner. <https://www.westgrid.ca/>. Accessed 7  
408 Feb 2018.
- 409 41. Compute Canada. <http://www.computecanada.ca/>. Accessed 7 Feb 2018.
